# Supplementary material
Source: PubMed Central journal article supplement (PMC10102412)
Supplement: mmc1.pdf [file mmc1.pdf]

**OMTM, Volume 29**

**Supplemental information**

**Simultaneous engineering of natural killer  
cells for CAR transgenesis and CRISPR-Cas9  
knockout using retroviral particles**

**Dong-Hyeon Jo, Shelby Kaczmarek, Oksu Shin, Lisheng Wang, Juthaporn Cowan, Scott McComb, and Seung-Hwan Lee**

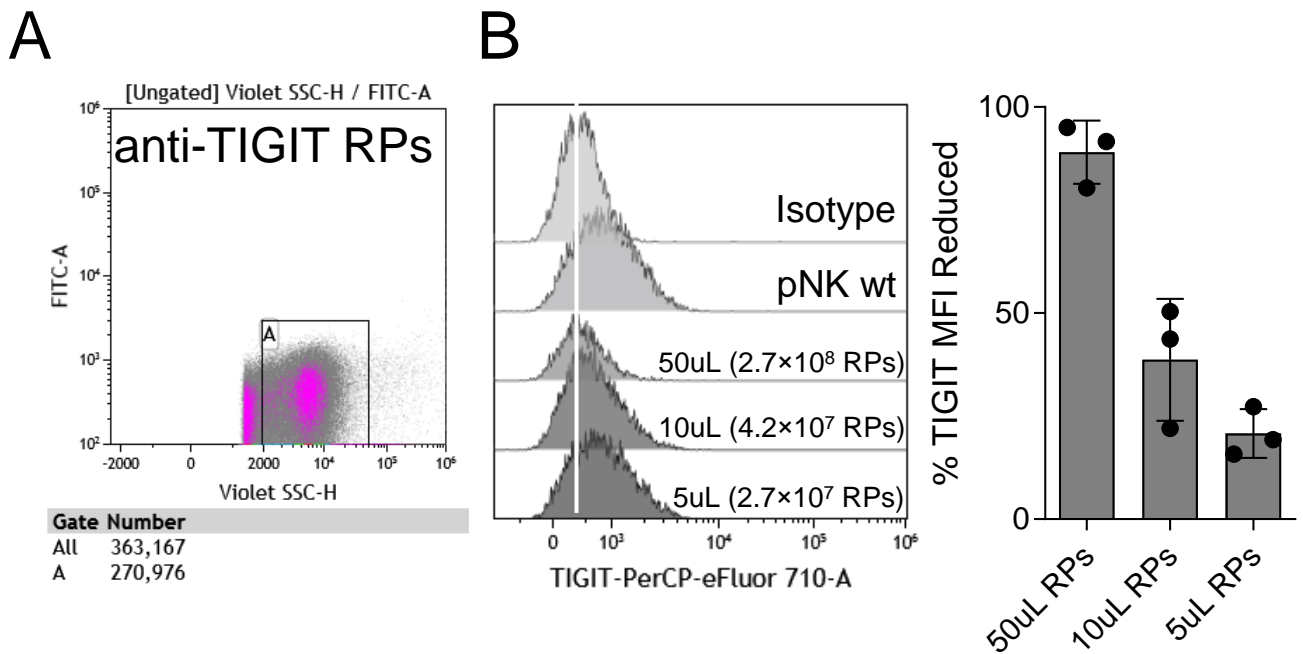

**Figure S1. The number of retroviral particles (RPs) for human primary NK cell TIGIT knockout (A) Representative dot-plot to gate RPs (B) Volume-based TIGIT knockout in NK cells and the number of particles in each volume.**

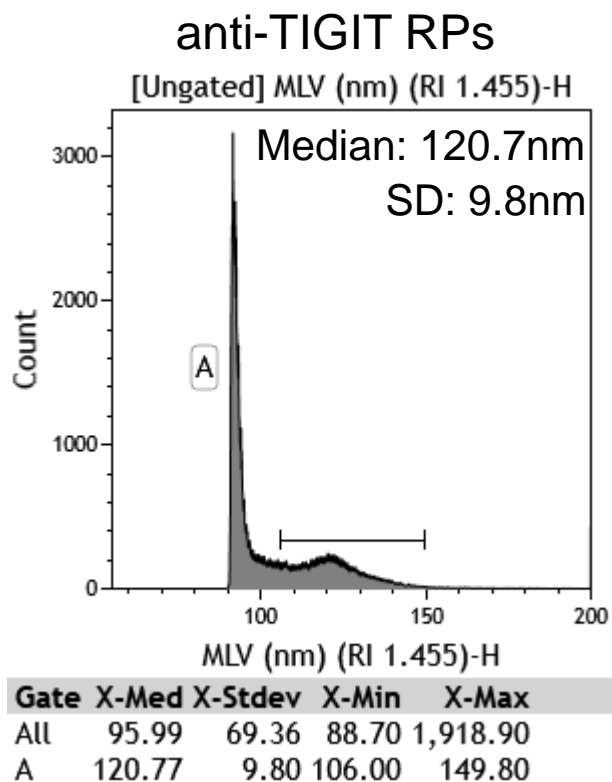

**Figure S2.** Size of the RPs calculated by FCMPASS based on polystyrene standard beads and **MLV refractive index, 1.455.** X-Med; Median, X-Stdev (SD); Standard deviation, X-Min; Minimum, X-Max, Maximum.

**A**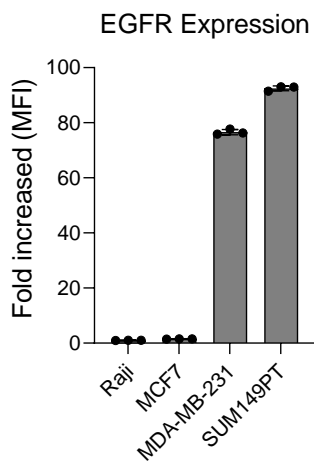**B**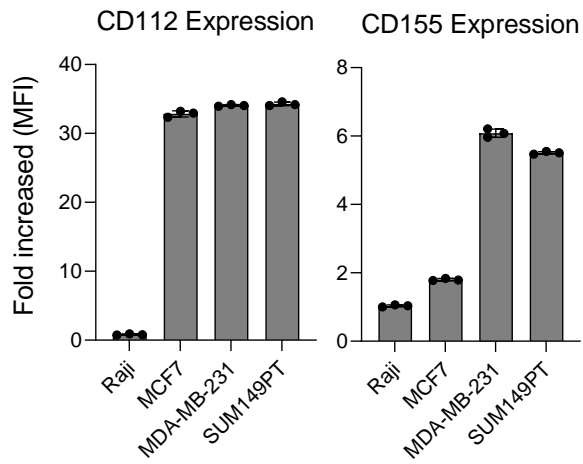

**Figure S3. Determination of EGFR and TIGIT-ligand expression, CD112 and CD155, on various cancer cells. (A)** Surface EGFR expression on the B cell, estrogen receptor-positive, and triple-negative breast cancer cell lines. **(B)** Surface expression of TIGIT ligand, CD112 and CD155, on the cancer cell lines.
